# Supplementary material for: USP48 Governs Cell Cycle Progression by Regulating the Protein Level of Aurora B
Source: MDPI journal article supplement (doi:10.3390/ijms22168508), 2021-08-07
Supplement: s1 [file s1]

# **USP48 Governs Cell Cycle Progression by Regulating the Protein Level of Aurora B**

**Ainsley Mike Antao <sup>1,†</sup>, Kamini Kaushal <sup>1,†</sup>, Soumyadip Das <sup>1</sup>, Vijai Singh <sup>2</sup>, Bharathi Suresh <sup>1</sup>, Kye-Seong Kim <sup>1,3,\*</sup> and Suresh Ramakrishna <sup>1,3,\*</sup>**

<sup>1</sup> Graduate School of Biomedical Science and Engineering, Hanyang University, Seoul 04763, Korea;  
ainsleyantao@gmail.com (A.M.A.); kaminikaushal10@gmail.com (K.K.); smdpdas6@gmail.com (S.D.);  
bharathi.suri@gmail.com (B.S.)

<sup>2</sup> Department of Biosciences, School of Science, Indrashil University, Rajpur, Gujarat 382740, India;  
vijai.singh@indrashiluniversity.edu.in (V.S.)

<sup>3</sup> College of Medicine, Hanyang University, Seoul 04763, Korea

\*Correspondence: ks66kim@hanyang.ac.kr (K.-S.K.); suri28@hanyang.ac.kr (S.R.)

†These authors contributed equally.

## **Table of Contents**

**Figure S1.** Expression box plot showing the differential expression of *Aurora B* and *USP48* in various cancer types

**Supplementary methods:** Detailed method for transfection and Western blot analysis.

**Figure S2.** The original uncropped images for all immunoblots represented in the main figures.

**Figure S3.** The triplicate images for the immunoblots represented as graphs in the main figures.

**Supplementary Movie 1.** Cytokinesis in mock HeLa cells and USP48 depleted HeLa cells.

**Figure S1.** Expression box plot showing the differential expression of *Aurora B* and *USP48* in various cancer types

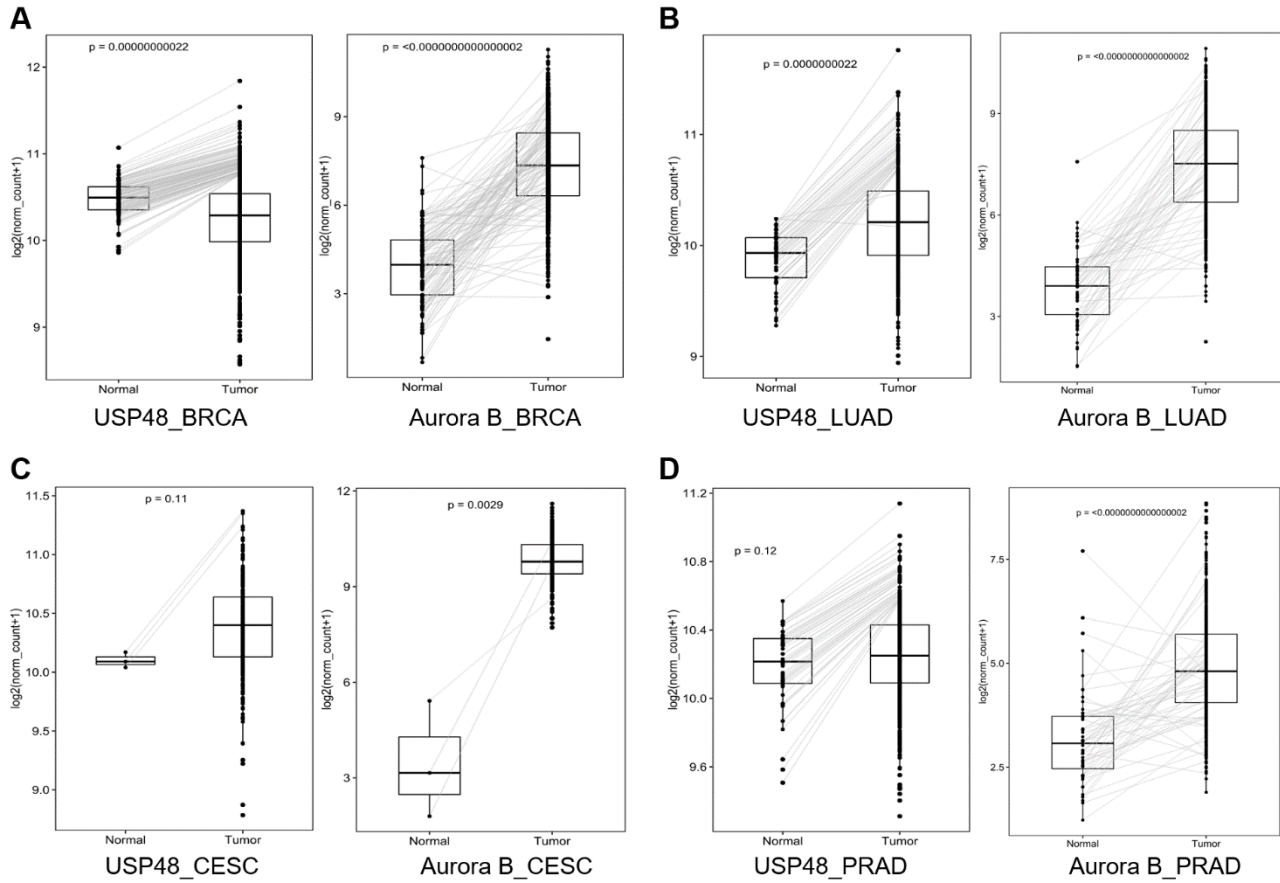

**Figure S1:** Expression box plot showing the differential expression of *USP48* and *Aurora B* in normal vs. tumor tissues for (A) BRCA, (B) LUAD, (C) CESC, and (D) PRAD using RNAseq data from the TCGA database.  $p$  value  $< 0.05$  was considered to be statistically significant.

## Supplementary methods

**Transfection method:** HeLa or HEK293 cells were seeded at  $2 \times 10^5$  in 35 mm Cell culture dish or  $1.5 \times 10^6$  in 100 mm Cell culture dish as indicated for each experiment and cultured for about 20 h in a humidified 5% CO<sub>2</sub> atmosphere at 37°C. The indicated concentrations of plasmids and PEI were diluted in Opti-MEM medium at total volume of 200 µL for a 35 mm dish or 600 µL for a 100 mm dish. The solution was incubated for 20 minutes at room temperature before adding to each well for transfection. Transfected cells were incubated for 18-20 h prior to media change. The cells were further incubated for 48-72 h for further treatments as indicated or harvested for Western blot analysis.

**Immunoblotting method:** The harvested cells were lysed in ice-cold RIPA buffer (Cat. #RC2002-050-00, Biosesang, Gyeonggi-do, South Korea) containing 50 mM Tris-HCl (pH 7.6), 1% Triton X-100, 150 mM NaCl, 0.1% SDS, 1% sodium deoxycholate, 2 mM EDTA, and 1 mM PMSF. The lysates were clarified by centrifugation at 15000 rpm for 20 minutes at 4°C followed by protein quantification using a BSA standard by Bradford assay. Equal amounts of proteins were aliquoted and diluted using 5X denaturing protein sample buffer containing 312.5 mM Tris-HCl (pH 6.8), 50% glycerol, 5% SDS, 5% β-mercaptoethanol, and 0.05% bromophenol blue and denatured by boiling at 95-100°C for 5 minutes. The denatured samples were then resolved using 10% SDS-PAGE electrophoresis at 80 V and transferred to activated PVDF membranes for 2 h at 0.5 constant amperes. Membranes were blocked for 1 h using 5% skim milk and the respective primary antibodies were diluted in 2.5% skim milk and incubated overnight at 4°C. Immunoblots were washed three times with 1X Tris-buffered saline containing Tween 20 (TBST) and incubated with respective HRP-conjugated secondary antibodies for 1 h at room temperature. Immunoblots were washed three times with TBST and images were captured using the ChemiDoc Imaging System and quantified using the ImageJ software.

**Figure S2.** The original uncropped images for immunoblots represented in the main figures.

**Methodology: Figure 1**

Cells seed number:  $2 \times 10^5$  in 35 mm dish for each transfection

Tranfection efficiency: 80-85% transfection

Transfection reagent: 1  $\mu$ g DNA:2  $\mu$ g PEI

Figure 1A: Plasmids concentrations: RFP-Cas9 =1  $\mu$ g; sgRNAs targeting individual USPs/ scrambled sgRNA (mock) =2  $\mu$ g; Myc-Aurora B=500 ng

Figure 1B: Plasmids concentrations: RFP-Cas9 =1  $\mu$ g; sgRNAs targeting individual USPs/ scrambled sgRNA (mock) =2  $\mu$ g

**Fig. 1**

**A**

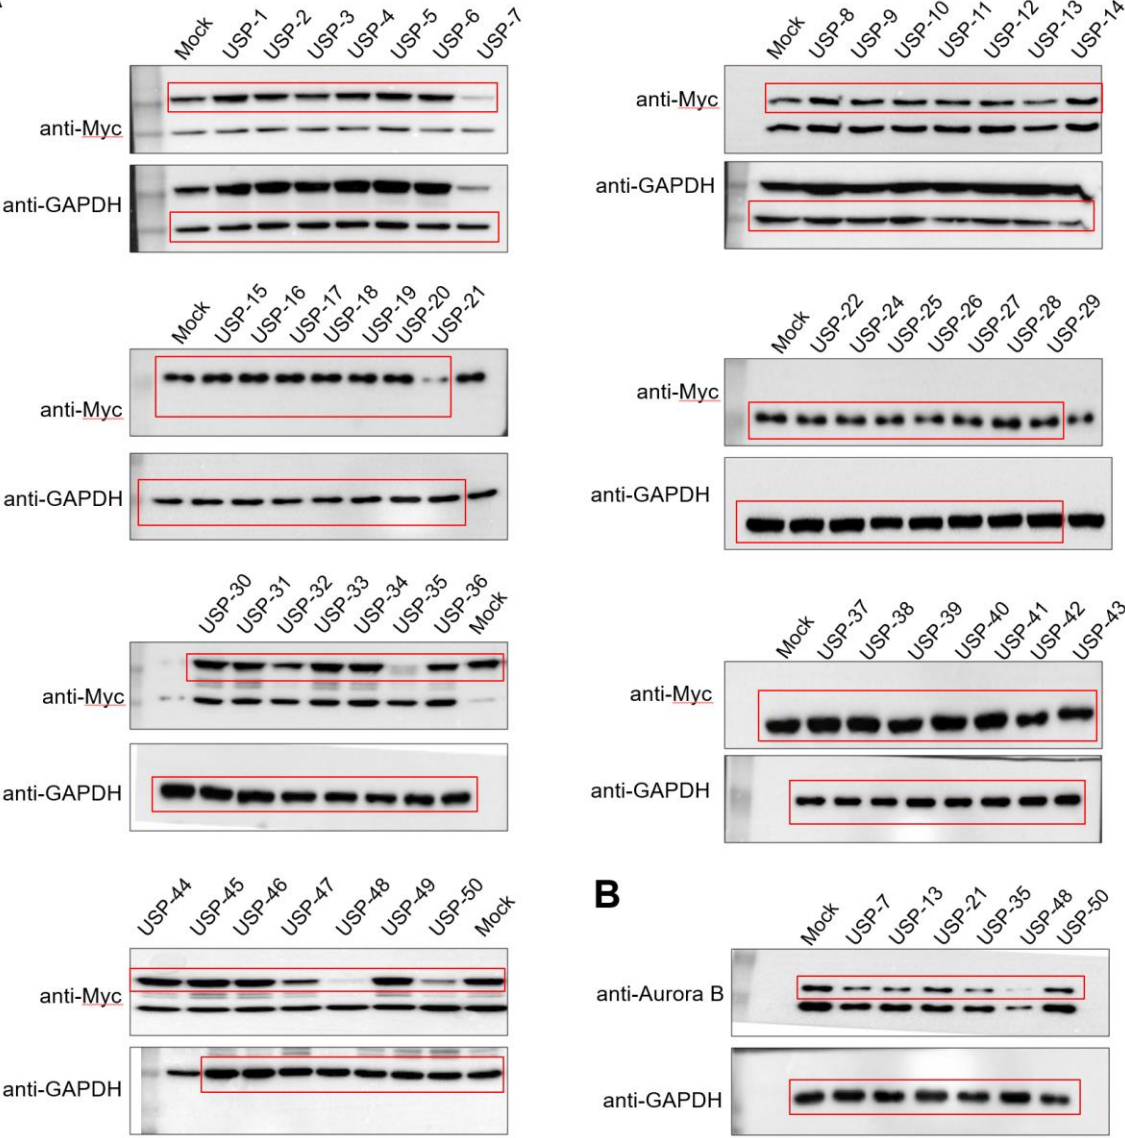

## Methodology: Figure 2

Cells seed number:  $2 \times 10^5$  in 35 mm dish for each transfection

Transfection efficiency: 80-85% transfection

Transfection reagent: 1  $\mu$ g DNA:2  $\mu$ g PEI

Figure 2A: Plasmids concentrations: RFP-Cas9 =1  $\mu$ g; sgRNAs targeting USP48/ scrambled sgRNA (mock) =2  $\mu$ g

Figure 2B: Plasmids concentrations: RFP-Cas9 =1  $\mu$ g; sgRNAs targeting individual USPs/ scrambled sgRNA (mock) =2  $\mu$ g; Myc-Aurora B=500 ng

Figure 2C: Plasmids concentrations: Flag-USP48 = 0, 1, 2, and 3  $\mu$ g

Figure 2D: Plasmids concentrations: Flag-USP48 = 0, 1, 2, and 3  $\mu$ g; Myc-Aurora B=500 ng

**Fig. 2**

**A**

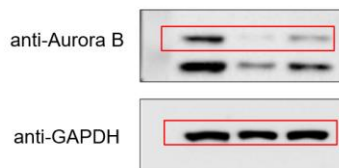

**B**

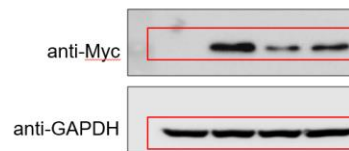

**C**

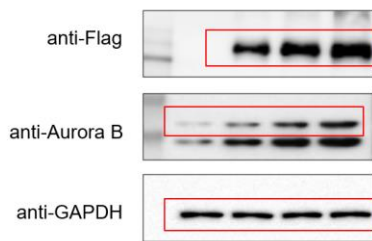

**D**

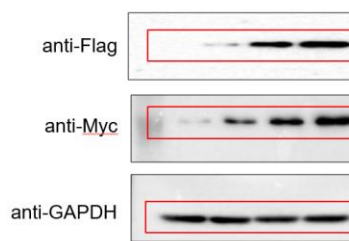

## Methodology: Figure 2

Cells seed number:  $2 \times 10^5$  in 35 mm dish for each transfection

Transfection efficiency: 80-85% transfection

Transfection reagent: 1  $\mu$ g DNA:2  $\mu$ g PEI

Figure 2E: Plasmids concentrations: Flag-USP48CS = 0, 1, 2, and 3  $\mu$ g

Figure 2F: Plasmids concentrations: Flag-USP48CS = 0, 1, 2, and 3  $\mu$ g; Myc-Aurora B=500 ng

Figure 2G: Plasmids concentrations: RFP-Cas9 =1  $\mu$ g; sgRNA1 targeting USP48=2  $\mu$ g; Flag-USP48 = 1  $\mu$ g

Figure 2H: Plasmids concentrations: RFP-Cas9 =1  $\mu$ g; sgRNA1 targeting USP48=2  $\mu$ g; Flag-USP48 = 1  $\mu$ g; Myc-Aurora B=500 ng

**Fig. 2**

**E**

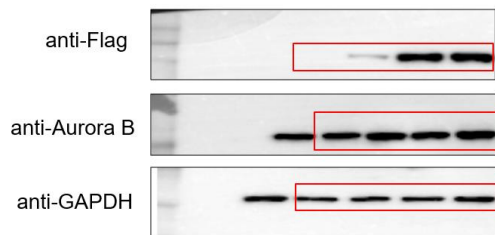

**F**

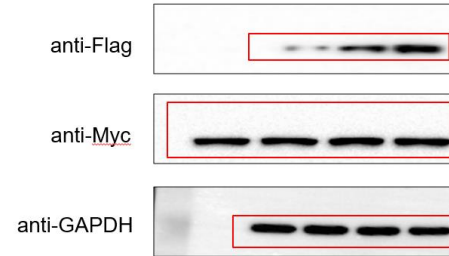

**G**

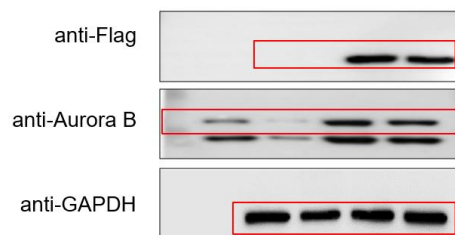

**H**

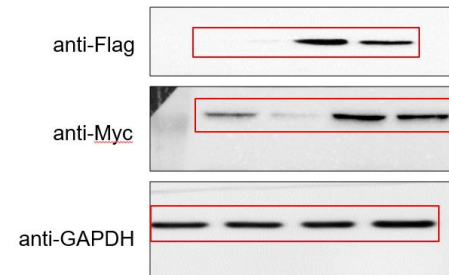

### Methodology: Figure 3

Cells seed number:  $1.5 \times 10^6$  in 100 mm dish for each transfection

Transfection efficiency: 80-85% transfection

Transfection reagent: 1  $\mu$ g DNA:2  $\mu$ g PEI

Figure 3A: Reagent for cell treatment: MG132 (5  $\mu$ g) for 8hr

Figure 3B: Plasmids concentrations: Flag-USP48 = 2  $\mu$ g; Myc-Aurora B = 2  $\mu$ g

**Fig. 3**

**A**

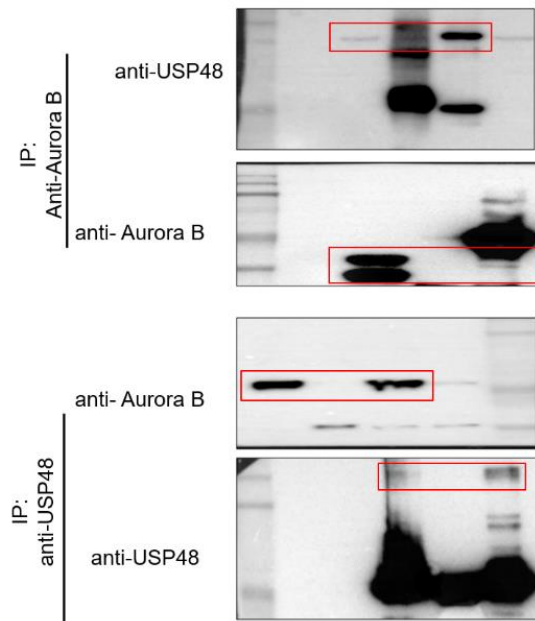

**B**

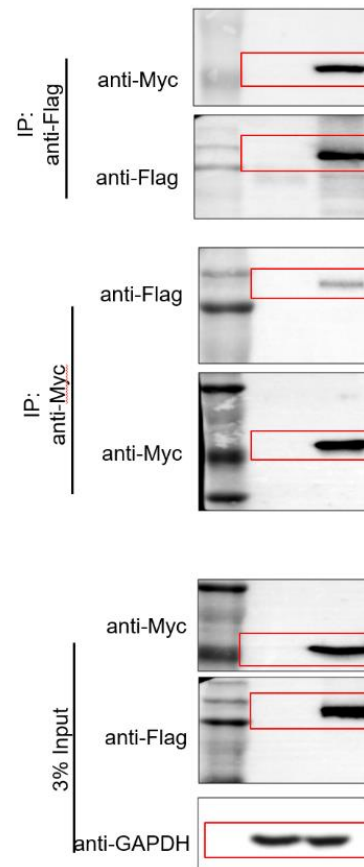



### Methodology: Figure 3

Cells seed number:  $1.5 \times 10^6$  in 100 mm dish for each transfection

Transfection efficiency: 80-85% transfection

Transfection reagent: 1  $\mu$ g DNA:2  $\mu$ g PEI

Figure 3C: Plasmids concentrations: Flag-USP48 = 2  $\mu$ g; Flag-USP48CS = 2  $\mu$ g; HA-Ubiquitin = 2  $\mu$ g; Myc-Aurora B = 2  $\mu$ g. Reagent for cell treatment: MG132 (5  $\mu$ g) for 8hr

Figure 3D: Cells seed number:  $2 \times 10^5$  in 35 mm dish for each transfection. Plasmids concentrations: RFP-Cas9 = 1  $\mu$ g; sgRNA1 targeting USP48 = 2  $\mu$ g; Flag-USP48 = 1  $\mu$ g

**Fig. 3**

**C**

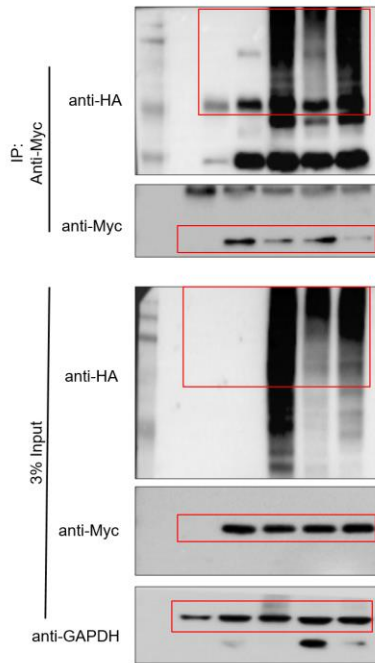

**D**

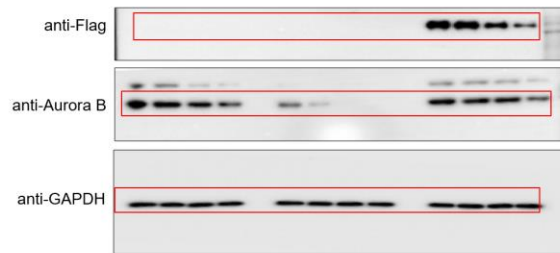

#### Methodology: Figure 4B

Cells seed number:  $2 \times 10^5$  in 35 mm dish

Reagent for cell treatment: 100 ng/mL Nocodazole for 18 h

**Fig. 4**  
**B**

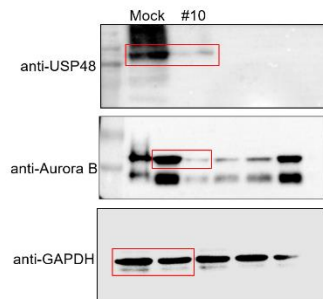

#### Methodology: Figure 5D

Cells seed number:  $2 \times 10^5$  in 35 mm dish for each transfection

Transfection efficiency: 80-85% transfection

Transfection reagent: 1  $\mu$ g DNA:2  $\mu$ g PEI

Plasmids concentrations: Flag-USP48 = 1  $\mu$ g; Flag-USP48CS = 1  $\mu$ g

**Fig. 5**  
**D**

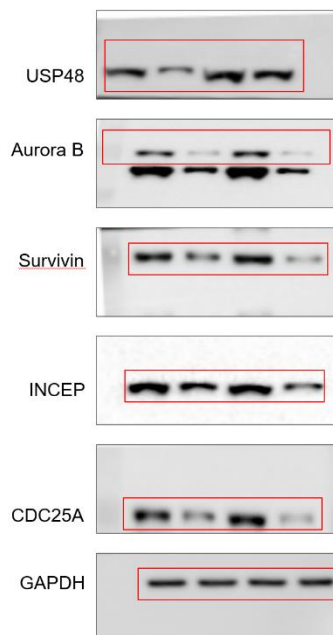

**Figure S3.** The triplicate images for the immunoblots represented as graphs in the main figures.

**Figure 2:**

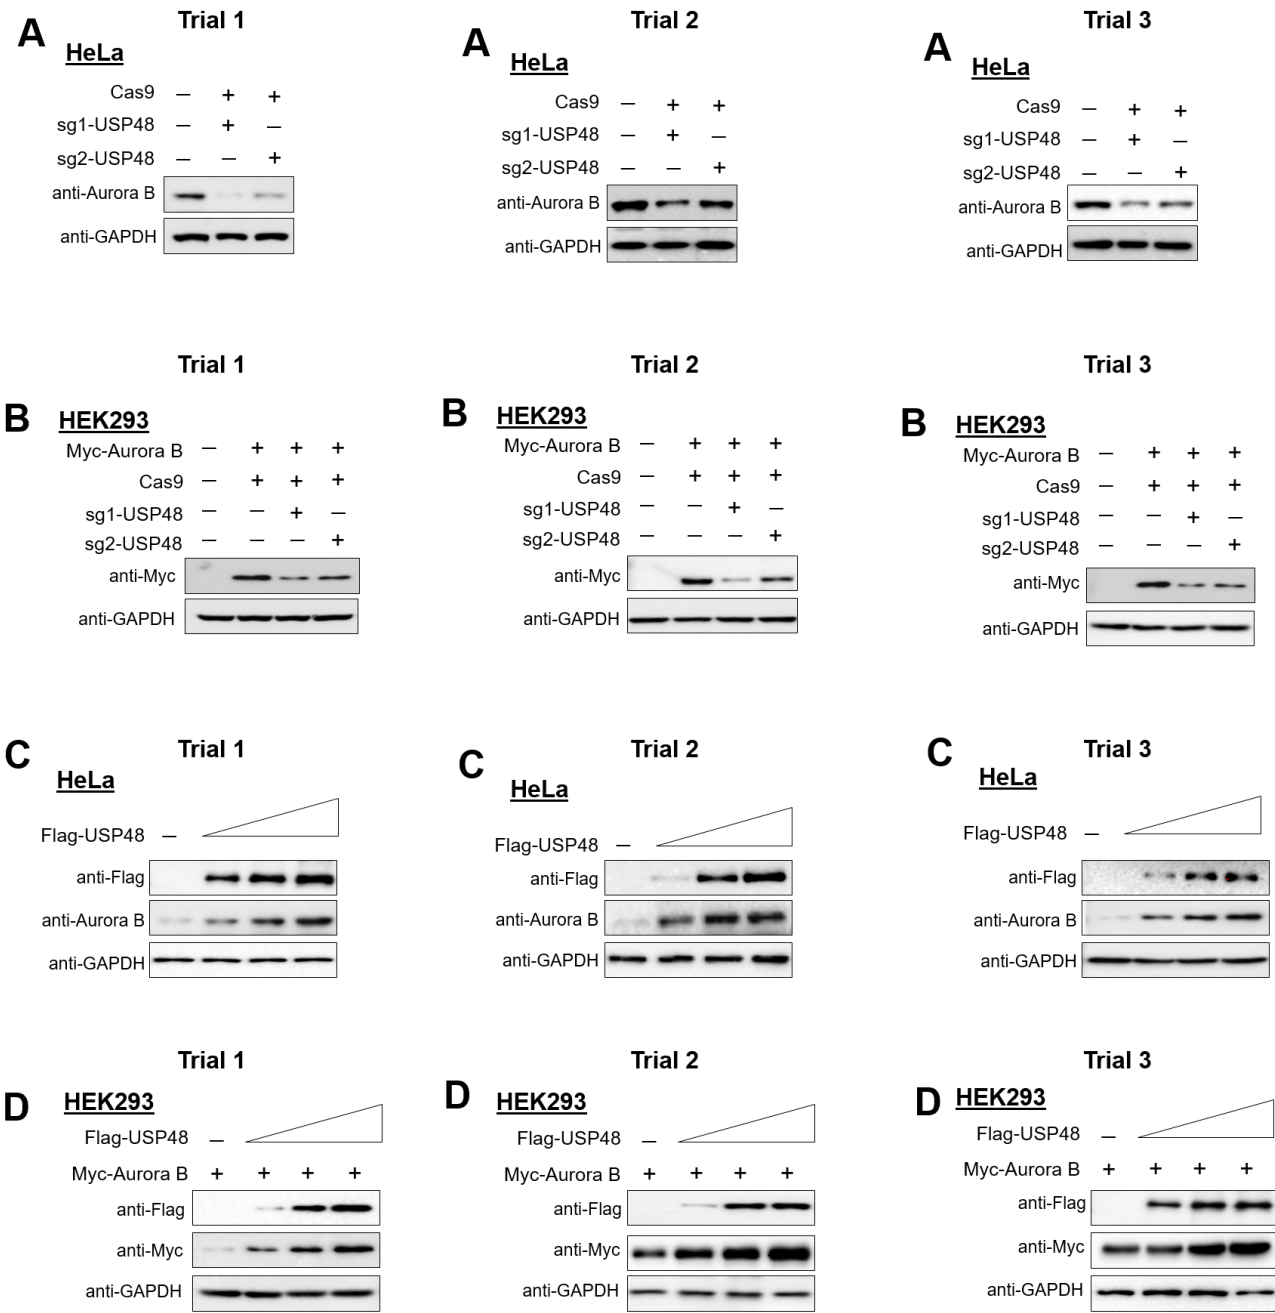

Figure 2:

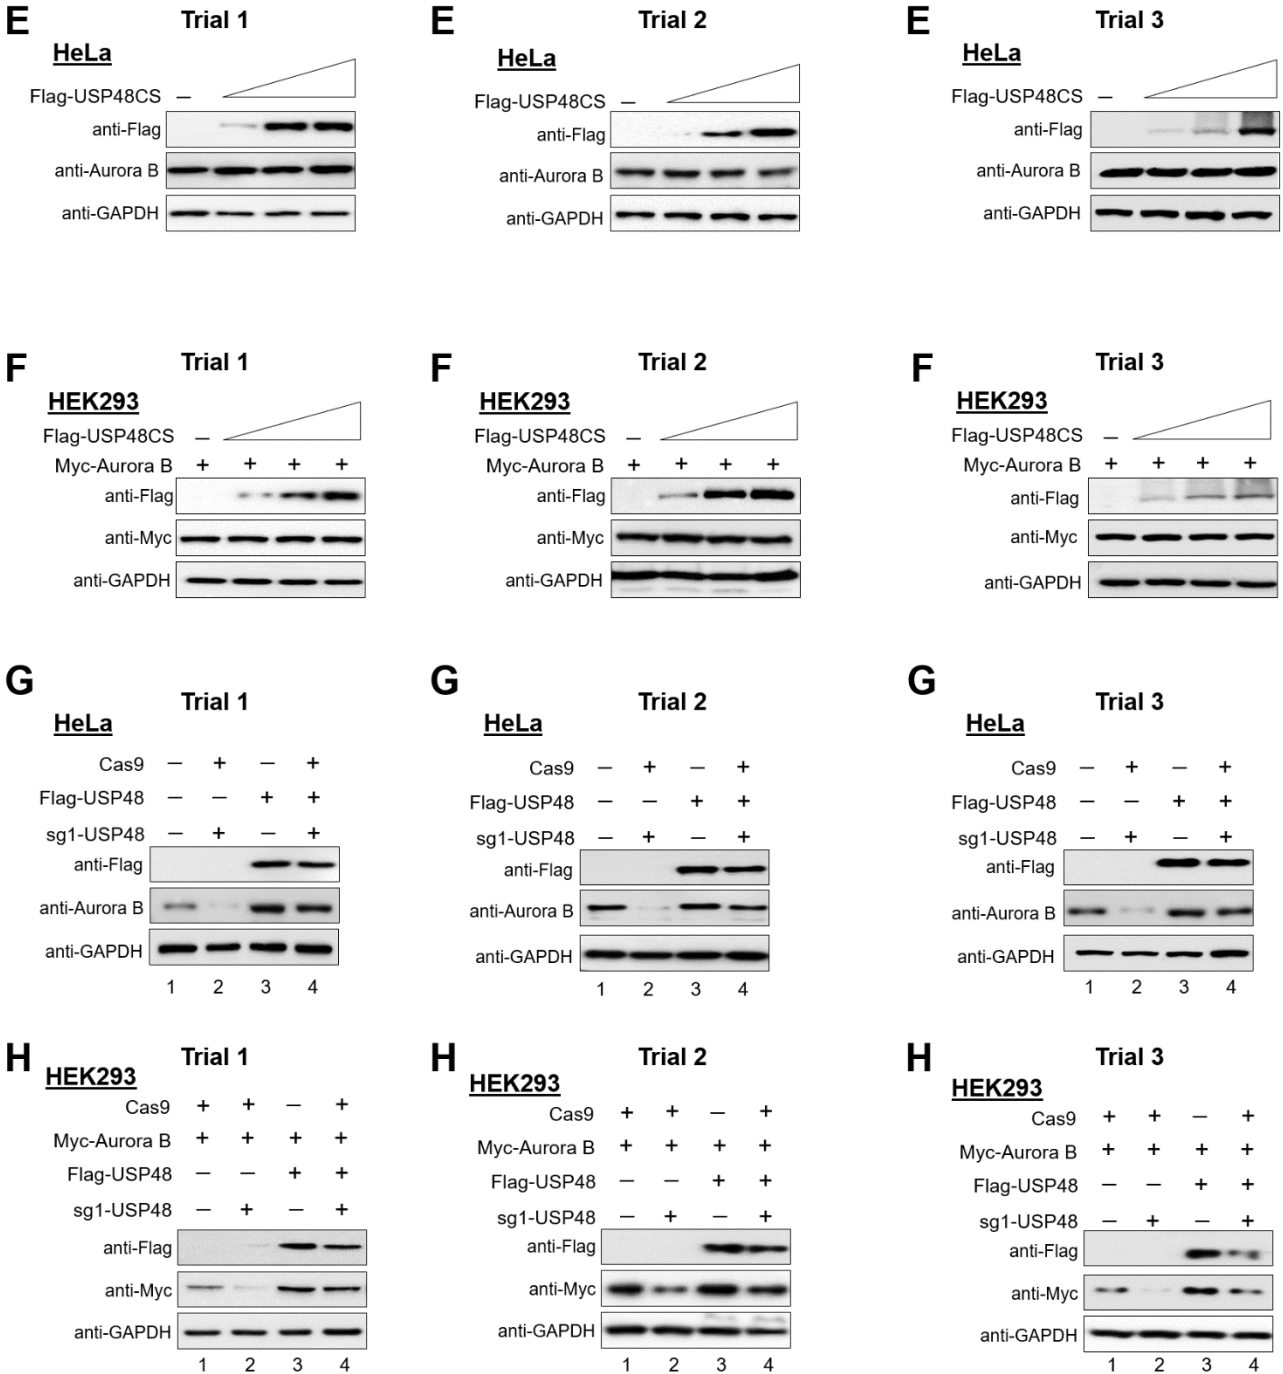

Figure 3:

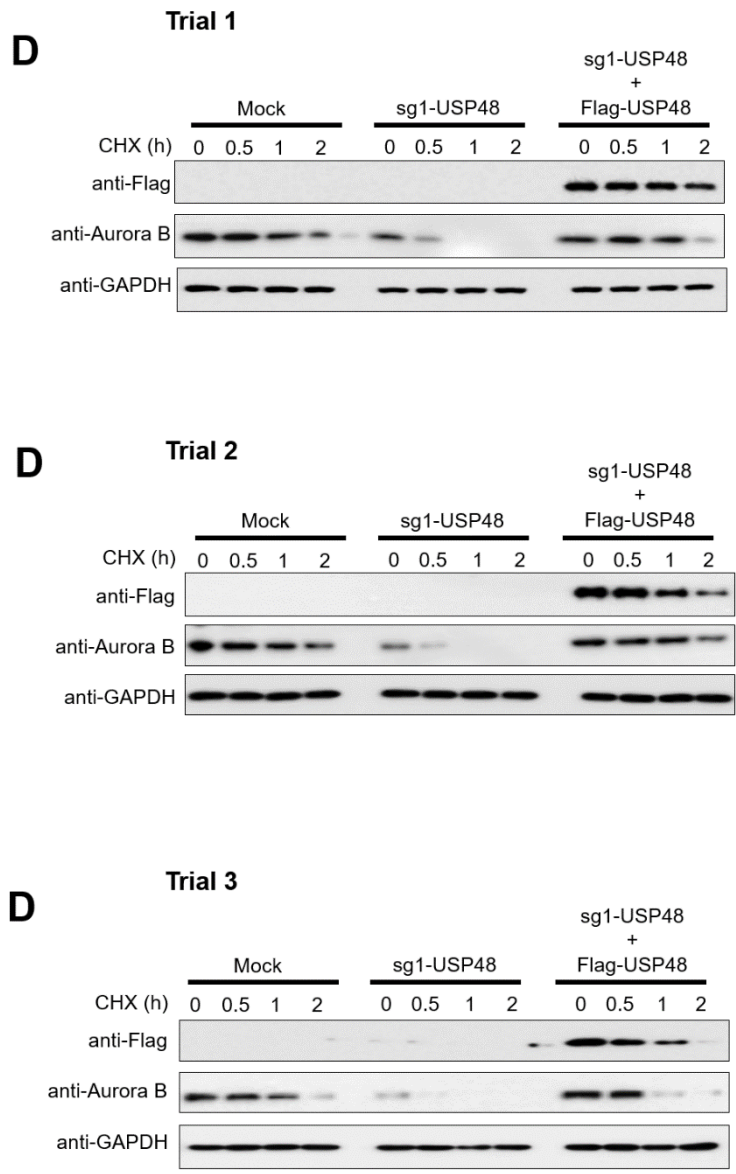

**Supplementary Movie 1.** Cytokinesis in mock HeLa cells and USP48 depleted HeLa cells. The video clips are attached separately.
